# Supplementary material for: Relationships of wild and domesticated rices (Oryza AA genome species) based upon whole chloroplast genome sequences
Source: PubMed Central journal article supplement (PMC4564799; doi:10.1038/srep13957), 2015-09-10
Supplement: srep13957-s1.pdf [file srep13957-s1.pdf]

## Supplementary information

### Relationships of wild and domesticated rices (*Oryza* AA genome species) based upon whole chloroplast genome sequences

Peterson W. Wambugu<sup>1</sup>, Marta Brozynska<sup>1</sup>, Agnelo Furtado<sup>1</sup>, Daniel L. Waters<sup>2</sup> and Robert J. Henry<sup>1\*</sup>

<sup>1</sup>Queensland Alliance for Agriculture and Food Innovation, The University of Queensland, Brisbane, St Lucia, Qld, 4072, Australia

<sup>2</sup>Southern Cross Plant Science, Southern Cross University, Lismore, NSW, Australia

## Supplementary Tables

### Supplementary Table S1: Details of seed samples used for DNA extraction

| Species                     | Accession number | Country of origin |
|-----------------------------|------------------|-------------------|
| <i>Oryza glaberrima</i>     | 104040           | Chad              |
| <i>Oryza longistaminata</i> | 103905           | Tanzania          |
| <i>Oryza longistaminata</i> | 81953            | Zambia            |
| <i>Oryza barthii</i>        | 103590           | Cameroon          |
| <i>Oryza barthii</i>        | 101381           | Niger             |
| <i>Oryza barthii</i>        | 104124           | Chad              |
| <i>Oryza barthii</i>        | 86481            | Zambia            |
| <i>Oryza glumaepatula</i>   | AusTRCF 309281   | Suriname          |
| <i>Oryza officinalis</i>    | AusTRCF 309302   | Myanmar           |

### Supplementary Table S2: Alignment statistics for whole chloroplast genome and with one inverted repeat (IR) excluded

| Statistics/parameter        | Whole cp genome | Cp genome with one IR excluded <sup>a</sup> |
|-----------------------------|-----------------|---------------------------------------------|
| Alignment length            | 143,331bp       | 114,151bp                                   |
| Conserved sites             | 134,353         | 113,591                                     |
| Variable sites              | 484             | 439                                         |
| Parsimony informative sites | 221             | 214                                         |
| Singleton sites             | 262             | 225                                         |
| GC content                  | 39.0            | 38.0                                        |

<sup>a</sup> *Oryza glaberrima* 2 was excluded in this analysis as it was not possible to accurately identify the inverted repeats (IR) due to suspected assembly errors.

### Supplementary Table S3: GenBank sequences used in this study

| Species                                | Length (bp) | Accession number |
|----------------------------------------|-------------|------------------|
| <i>O. sativa</i> sp. <i>Japonica</i> 1 | 134,551     | GU592207         |
| <i>O. sativa</i> sp. <i>Japonica</i> 2 | 134,525     | NC_001320        |
| <i>O. sativa</i> sp. <i>Indica</i> 1   | 134,448     | JN861109         |
| <i>O. sativa</i> sp. <i>Indica</i> 2   | 134,496     | NC_008155        |
| <i>O. rufipogon</i> 1                  | 134,537     | KF562709         |
| <i>O. rufipogon</i> 2                  | 134,557     | NC_022668        |
| <i>O. rufipogon</i> 3                  | 134,,557    | JN005833         |
| <i>O. meridionalis</i>                 | 134,558     | NC_016927        |
| <i>O. nivara</i>                       | 134,494     | NC_005973        |
| <i>O. glaberrima</i> 2                 | 132,629     | KJ513090         |

## **Supplementary results**

Sequencing of 9 genomes produced a varying number of paired reads that ranged from 34562744 - 38275022. Reference guided assembly resulted in mapping rates that ranged from 5.1% to 12.6% which is equivalent to chloroplast genome fold coverage of between 1319X and 3443X (Table 1). The assembled genomes had a quadripartite structure comprising of a long single copy (80512-80684bp) and a short single copy (12336-12386bp) separated by a pair of inverted repeat regions (20794-20809bp) (Fig. 1). Each genome had a total of 124 unique genes comprising of 83 protein coding genes, 33 transfer RNA (tRNA) and 8 ribosomal RNA (rRNA) genes.
